# Supplementary material
Source: publisher figshare collection journal article supplement (https://sage.figshare.com/ndownloader/files/24120359)
Supplement: Supplementary file 1 [file 24120359]

### **Annex 1: List of end-of-life items**

People differ in their opinion about what is important to ensure to spend best possible their last months of life. How important are each of the following potential end-of-life aspects for you when thinking about the last six months of your life?

- a. Spending time with family and friends
- b. Feeling useful to others (giving time, sharing knowledge, etc.)
- c. Avoiding to be a burden on society
- d. Avoiding to be a burden on my family
- e. Feeling that my family is prepared for my death
- f. Planning the events following my death (funeral, obituary, etc.)
- g. Having my finances in order
- h. Choosing where I die
- i. Not dying alone
- j. Talking about my fears
- k. Being at peace with others
- l. Being at peace with myself
- m. Receiving spiritual or religious assistance
- n. Avoiding overtreatment
- o. Having physical contact (e.g. hold hands)
- p. Being able to talk or communicate with others
- q. Being able to feed myself
- r. Using all available medical treatments to prolong life until the end
- s. Living without pain
- t. Keeping clean (personal hygiene)
- u. Being fully mentally aware
- v. Deciding in advance about medical treatments
- w. Having confidence in my treating physician

#### **Answer categories**

- 1. Not important
- 2. Not so important
- 3. Important
- 4. Very important
